# Supplementary material
Source: PubMed Central journal article supplement (PMC9418386)
Supplement: NIHMS1784798-supplement-Supp.pdf [file NIHMS1784798-supplement-Supp.pdf]

**Supporting Information for “Bayesian interaction selection model for multi-modal neuroimaging data analysis” by Yize Zhao, Ben Wu and Jian Kang**

**Yize Zhao<sup>1\*</sup>, Ben Wu<sup>2</sup> and Jian Kang<sup>3</sup>**

<sup>1</sup>Department of Biostatistics, Yale School of Public Health, New Haven, CT, US.

<sup>2</sup> Center for Applied Statistics, School of Statistics, Renmin University of China, Beijing, China.

<sup>3</sup>Department of Biostatistics, University of Michigan, Ann Arbor, MI, US.

\**email:* yize.zhao@yale.edu

## Web Appendix A. Other types of outcome

Besides continuous outcomes, we can extend the model to fit more general outcome types in biomedical practice like binary or categorical outcomes. For instance, in the ABCD study, it is also of interest to explore brain functional activities associated with the risk of attention deficit hyperactivity disorder (ADHD). When  $y_i \in \{0, 1\}$ , we use a logistic regression

$$\text{logit}P(y_i = 1 | \mathbf{s}_i, \mathbf{x}_i) = \mathbf{s}_i^T \boldsymbol{\beta}_0 + \sum_{m=1}^M \mathbf{x}_{im}^T \boldsymbol{\beta}_m + \sum_{m < m'}^M \sum_{m'=1}^M (\mathbf{x}_{im} \circ \mathbf{x}_{im'})^T \boldsymbol{\beta}_{\langle m, m' \rangle}, \quad (\text{A.1})$$

where the partition construction and prior settings can be directly inserted into the linear term on the right hand side. To perform the posterior inference, following the data augmentation approach by Polson et al. (2013), we introduce latent variable  $\omega_i, i = 1, \dots, n$ , and define  $\tilde{\mathbf{y}} = (\frac{y_1-1/2}{\omega_1}, \dots, \frac{y_n-1/2}{\omega_n})$ . The posterior inference for each unknown parameter within  $\Phi$  will keep consistent with the main MCMC algorithm by replacing  $\mathbf{y}$  with  $\tilde{\mathbf{y}}$ , and posterior inference for latent variable  $\omega_i$  will sample from a Pólya-Gamma (PG) distribution

$$[\omega_i | \boldsymbol{\beta}_0, \boldsymbol{\alpha}, \boldsymbol{\delta}, \mathbf{s}_i, \mathbf{x}_i, \mathbf{x}_{i,inter}] \sim \text{PG}\{1, \mathbf{s}_i^T \boldsymbol{\beta}_0 + \mathbf{x}_i^T (\boldsymbol{\delta} \circ \boldsymbol{\alpha}) + \mathbf{x}_{i,inter}^T (\boldsymbol{\delta}_{inter} \circ \boldsymbol{\alpha}_{inter})\}. \quad (\text{A.2})$$

Based on the posterior samples, we can directly identify and prioritize risk imaging features and quantify their contribution with respect to the odds ratio. Compared with the alternative probit regression (Albert and Chib, 1993) which involves sampling from a truncated normal distribution, the above choice is more straightforward in computation and explanation.

## Web Appendix B. MCMC algorithm

We provide the detailed MCMC algorithm for the BSSS model based on Gibbs sampler. Under random initials, we iteratively update each parameter according to the following steps:

*Sampling scheme for  $\beta_0$ .* Draw

$$[\beta_0 \mid \mathbf{y}, \mathbf{X}, \mathbf{X}_{inter}, \mathbf{S}, \boldsymbol{\alpha}, \boldsymbol{\alpha}_{inter}, \boldsymbol{\delta}, \boldsymbol{\delta}_{inter}, \sigma_\epsilon^2] \sim N(\boldsymbol{\mu}_{\beta_0}, \Sigma_{\beta_0}),$$

with  $\Sigma_{\beta_0} = (\mathbf{S}^T \mathbf{S} / \sigma_\epsilon^2 + \sigma_0^{-2} I)^{-1}$ , and  $\boldsymbol{\mu}_{\beta_0} = \Sigma_{\beta_0} (\mathbf{y} - \mathbf{X}(\boldsymbol{\delta} \circ \boldsymbol{\alpha}) - \mathbf{X}_{inter}(\boldsymbol{\delta}_{inter} \circ \boldsymbol{\alpha}_{inter})) \mathbf{S} / \sigma_\epsilon^2$ .

*Sampling scheme for  $\boldsymbol{\alpha}$ .* Based on  $\boldsymbol{\delta}$ , divide  $\boldsymbol{\alpha}$  into the unselected segment  $\boldsymbol{\alpha}_0$  and selected one  $\boldsymbol{\alpha}_1$ . Then we sample  $\boldsymbol{\alpha}_0 \sim N(\mathbf{0}, \sigma_1^2 \mathbf{I})$  and

$$[\boldsymbol{\alpha}_1 \mid \mathbf{y}, \mathbf{X}, \mathbf{X}_{inter}, \mathbf{S}, \beta_0, \boldsymbol{\alpha}_{inter}, \boldsymbol{\delta}_{inter}, \sigma_1^2] \sim N(\boldsymbol{\mu}_\alpha, \Sigma_\alpha),$$

with  $\Sigma_\alpha = (\mathbf{X}_\delta^T \mathbf{X}_\delta / \sigma_\epsilon^2 + \sigma_1^{-2} I)^{-1}$ , and  $\boldsymbol{\mu}_\alpha = \Sigma_\alpha \mathbf{X}_\delta^T (\mathbf{y} - \mathbf{S} \beta_0 - \mathbf{X}_{inter}(\boldsymbol{\delta}_{inter} \circ \boldsymbol{\alpha}_{inter})) / \sigma_\epsilon^2$ , where  $\mathbf{X}_\delta$  includes the columns of  $\mathbf{X}$  corresponding to  $\delta = 1$ .

*Sampling scheme for  $\boldsymbol{\alpha}_{inter}$ .* Based on  $\boldsymbol{\delta}_{inter}$ , divide  $\boldsymbol{\alpha}_{inter}$  into the unselected segment  $\boldsymbol{\alpha}_{inter,0}$  and selected one  $\boldsymbol{\alpha}_{inter,1}$ . Then we sample  $\boldsymbol{\alpha}_{inter,0} \sim N(\mathbf{0}, \sigma_2^2 \mathbf{I})$  and

$$[\boldsymbol{\alpha}_{inter,1} \mid \mathbf{y}, \mathbf{X}, \mathbf{X}_{inter}, \mathbf{S}, \beta_0, \boldsymbol{\alpha}_{inter}, \boldsymbol{\delta}_{inter}, \sigma_1^2] \sim N(\boldsymbol{\mu}_{\alpha_{inter}}, \Sigma_{\alpha_{inter}}),$$

with  $\Sigma_{\alpha_{inter}} = (\mathbf{X}_{\delta_{inter}}^T \mathbf{X}_{\delta_{inter}} / \sigma_\epsilon^2 + \sigma_2^{-2} I)^{-1}$ , and  $\boldsymbol{\mu}_{\alpha_{inter}} = \Sigma_{\alpha_{inter}} \mathbf{X}_{\delta_{inter}}^T (\mathbf{y} - \mathbf{S} \beta_0 - \mathbf{X}(\boldsymbol{\delta} \circ \boldsymbol{\alpha})) / \sigma_\epsilon^2$ , where  $\mathbf{X}_{\delta_{inter}}$  includes the columns of  $\mathbf{X}_{inter}$  corresponding to  $\delta_{inter} = 1$ .

*Sampling scheme for  $\gamma_l^{(1)}, l = 1, \dots, m^{(1)}$ .* The full conditional of  $\gamma_l^{(1)}$  is given by

$$\begin{aligned} & [\gamma_l^{(1)} \mid \boldsymbol{\delta}, \mathbf{y}, \mathbf{X}, \mathbf{X}_{inter}, \mathbf{S}, \beta_0, \boldsymbol{\alpha}, \boldsymbol{\alpha}_{inter}] \\ & \propto p_1^{\gamma_l^{(1)}} (1 - p_1)^{1 - \gamma_l^{(1)}} \exp\left\{\frac{1}{2\sigma_\epsilon^2} \|\mathbf{y} - \mathbf{S} \beta_0 - \mathbf{X}(\boldsymbol{\delta} \circ \boldsymbol{\alpha}) - \mathbf{X}_{inter}(\boldsymbol{\delta}_{inter} \circ \boldsymbol{\alpha}_{inter})\|^2\right\} \end{aligned}$$

*Sampling scheme for  $\gamma_l^{(k)}, k = 2, \dots, K - 1$ .* Divide  $\boldsymbol{\delta}^{(k-1)}$  into two pieces by their values and update the index sets as  $\Theta_t^{(k-1)} = \{l : \delta_l^{(k-1)} = t\}$ ,  $t = 0, 1$ . Correspondingly,  $\Theta_t^{(k)} = \{l : a_{l,l'}^{(k)}, l' \in \Theta_t^{(k-1)}\}$ ,  $t = 0, 1$ . For  $l \in \Theta_0^{(k)}$ , sample  $\gamma_l^{(k)} \sim \text{Bern}(p_k)$ . For  $l \in \Theta_1^{(k)}$ , sample

$$\begin{aligned} & [\gamma_l^{(k)} \mid \boldsymbol{\delta}, \boldsymbol{\delta}_{inter}, \mathbf{y}, \mathbf{X}, \mathbf{X}_{inter}, \mathbf{S}, \beta_0, \boldsymbol{\alpha}, \boldsymbol{\alpha}_{inter}] \\ & \propto p_k^{\gamma_l^{(k)}} (1 - p_k)^{1 - \gamma_l^{(k)}} \exp\left\{\frac{1}{2\sigma_\epsilon^2} \|\mathbf{y} - \mathbf{S} \beta_0 - \mathbf{X}(\boldsymbol{\delta} \circ \boldsymbol{\alpha}) - \mathbf{X}_{inter}(\boldsymbol{\delta}_{inter} \circ \boldsymbol{\alpha}_{inter})\|^2\right\}. \end{aligned}$$

*Sampling scheme for  $\gamma_i^{(K)}$ .* Update index set  $\Theta_t^{(K)} = \{l : \mathcal{I}[A^{(K-2)}\boldsymbol{\delta}^{(K-1)}]_l = t\}$ ,  $t = 0, 1$ . For  $l \in \Theta_0^{(K)}$ , sample  $\gamma_l^{(K)} \sim \text{Bern}(p_K)$ . For  $l \in \Theta_1^{(K)}$

$$[\gamma_l^{(K)} \mid \boldsymbol{\delta}, \boldsymbol{\delta}_{inter}, \mathbf{y}, \mathbf{X}, \mathbf{X}_{inter}, \mathbf{S}, \boldsymbol{\beta}_0, \boldsymbol{\alpha}, \boldsymbol{\alpha}_{inter}] \\ \propto p_K^{\gamma_l^{(K)}} (1 - p_K)^{1 - \gamma_l^{(K)}} \exp\left\{\frac{1}{2\sigma_\epsilon^2} \|\mathbf{y} - \mathbf{S}\boldsymbol{\beta}_0 - \mathbf{X}(\boldsymbol{\delta} \circ \boldsymbol{\alpha}) - \mathbf{X}_{inter}(\boldsymbol{\delta}_{inter} \circ \boldsymbol{\alpha}_{inter})\|^2\right\}.$$

*Sampling scheme for  $\sigma_1^2$ .* Draw

$$[\sigma_1^2 \mid \boldsymbol{\alpha}] \sim \text{IG}\left(a_\sigma + PM/2, b_\sigma + \frac{\boldsymbol{\alpha}^T \boldsymbol{\alpha}}{2}\right).$$

*Sampling scheme for  $\sigma_2^2$ .* Draw

$$[\sigma_2^2 \mid \boldsymbol{\alpha}_{inter}] \sim \text{IG}\left(a_\sigma + PM(M - 1)/4, b_\sigma + \frac{\boldsymbol{\alpha}_{inter}^T \boldsymbol{\alpha}_{inter}}{2}\right).$$

*Sampling scheme for  $\sigma_\epsilon^2$ .* Draw

$$[\sigma_\epsilon^2 \mid \boldsymbol{\delta}, \boldsymbol{\delta}_{inter}, \mathbf{y}, \mathbf{X}, \mathbf{X}_{inter}, \mathbf{S}, \boldsymbol{\beta}_0, \boldsymbol{\alpha}, \boldsymbol{\alpha}_{inter}] \\ \sim \text{IG}(a_\epsilon + n/2, b_\epsilon + \frac{1}{2\sigma_\epsilon^2} \|\mathbf{y} - \mathbf{S}\boldsymbol{\beta}_0 - \mathbf{X}(\boldsymbol{\delta} \circ \boldsymbol{\alpha}) - \mathbf{X}_{inter}(\boldsymbol{\delta}_{inter} \circ \boldsymbol{\alpha}_{inter})\|^2).$$

## Web Appendix C. Additional simulations and assessment

### C.1 Posterior Convergence

To show the posterior convergence for the simulation over 5,000 iterations, we randomly select two main effect selection indicators at level  $K - 1$  and two interaction effect selection indicators at level  $K$ , and summarize their marginal inclusion probability for every 50 iterations. Figure 1 shows the trace plots for simulated 2D image data with  $n = 300$  and low noise, where we can clearly identify convergence after the burn-in period. We have also conducted convergence diagnostics using the GR method (Gelman and Rubin, 1992). The potential scale reduction factors (PSRF) for the log-likelihood with multiple runs started from random initials is smaller than 1.2, confirming convergence.

### C.2 *Simulation 2*

To assess the robustness of the BSSS to the partition construction, besides BSSS-P1 and BSSS-P2 from simulation 1, we consider three additional partition designs (BSSS-P3, BSSS-P4 and BSSS-P5) with four levels of partition for the 2D case as shown in Figure 2. The only difference among the three designs lies on the partition level 1. For BSSS-P3, the partition level 1 can perfectly distinguish activated and unactivated regions. For BSSS-P4 and BSSS-P5, the partition level 1 shifts, considering as “wrong” construction. We apply all the five BSSS versions to the simulated data following the same implementation procedure as that for the first simulation, and as shown in Table 1, the five designs yield quite consistent results and all of them outperform the competing approaches. This finding implies the relatively robustness of our model to the partition design.

### C.3 *Simulation 3*

We perform a real data scale simulation by directly using the 2-back versus baseline and 0-back versus baseline whole brain imaging data from the ABCD study as our multi-modality main effects and consider their interaction in prediction. To generate  $\beta_1$ ,  $\beta_2$  and  $\beta_{\langle 1,2 \rangle}$ , we set the locations of the main and interaction effect signals closely related to actual imaging signals we identified in the data analysis in Section 4; and generate the nonzero elements in  $\beta_1$  and  $\beta_2$  from  $N(2, 1)$ ; and those in  $\beta_{\langle 1,2 \rangle}$  from  $N(-2, 1)$ . We also consider different signal-to-noise-ratios with  $R^2$  around 0.76 (high noise) and 0.99 (low noise). We simulate 100 MC datasets, and to assess the out-of-sample performance, for each dataset, we randomly split the data by 5-fold, with 4-fold to be training set and 1-fold to be testing set. The partition construction for BSSS stays the same as that in the data application, and the implementations for BSSS, LASSO and horseshoe directly follow those in the first simulation. Eventually, the selection accuracy and prediction performance are presented in Table 2. Based on the result, the proposed BSSS maintains its superior performance in both feature selection

and prediction compared with competing alternatives. This reassures the use of BSSS in the ABCD application. Particularly, when comparing between different noise levels, we conclude that BSSS displays satisfactory robustness to high noises without a significant decrease of AUCs and the out-of-sample  $R^2$ . The LASSO and horseshoe, however, show different degrees of deterioration in predictive power compared to low noise scenarios.

## **Web Appendix D. Additional analysis results for the ABCD study**

### *D.1 Posterior Convergence*

We have checked the posterior convergence of our BSSS implementation. We randomly select two main effect selection indicators at level  $K - 1$  and two interaction effect selection indicators at level  $K$ , and summarize their marginal inclusion probability for every 50 iterations. As it is shown in Figure 3, the chain is clearly converged after the burn-in period (marked by the red dashed line). To further confirm the posterior convergence based on the GR method (Gelman and Rubin, 1992), under multiple runs started from random initials, we have also calculated the potential scale reduction factors (PSRF) for the log-likelihood over iterations after burn-in, and the value is smaller than 1.2, confirming convergence.

### *D.2 Additional tables*

Based on the analysis results for the ABCD data, we summarize the posterior median proportion of voxels with a posterior inclusion probability higher than 0.95 for each AAL ROI. The full list of brain regions and the associated signal proportion under both main and interaction effects are provided in Table 3.

### *D.3 Additional Figures*

The imaging protocol of the ABCD study follows a well-developed harmonization process to remove site effect, i.e. the measurement of brain structure and function have been harmonized to be compatible across three 3 tesla (T) scanner platforms: Siemens Prisma, General

Electric 750 and Phillips across 21 sites (Casey et al., 2018). In addition, with respect to our analysis, we also summarize the residuals across 21 sites as showed in Figure 4. Overall, the residuals are balanced across different sites with none of them displaying an obvious difference compared to the rest. This further confirms site information does not bring significant impact on our prediction.

#### D.4 Sensitivity analysis

We perform a sensitivity analysis to assess how sensitive the proposed BSSS method is to the pre-specified parameter settings. Given all of our hyper-priors are non-informative, we mainly focus on the partition design to evaluate the result changes under different partition constructions. Besides the partition design under six levels presented in the paper, we also implement BSSS under additional four partition designs with each of them also established under six levels. The difference between each additional partition design to the main one is we separately modify the partition construction at level 2 for two of them, and level 3 for the rest two. Once certain level of partitions are modified, all the subsequent levels will be changed accordingly. To assess the result consistency, we summarize the posterior median proportion of voxels with a posterior inclusion probability higher than 0.95 for each brain region and the corresponding brain sub-network for BSSS under each partition design, and the top 5 regions and top 3 sub-networks under each implementation are provided in Tables 4 and 5. Based on the results, we see a general consistency with mild differences, which confirms that partitions design though play a vital role in our method for signal detection, does not dramatically impact the final conclusion.

## References

- Albert, J. H. and Chib, S. (1993). Bayesian analysis of binary and polychotomous response data. *Journal of the American Statistical Association* **88**, 669–679.

- Casey, B., Cannonier, T., Conley, M. I., Cohen, A. O., Barch, D. M., Heitzeg, M. M., Soules, M. E., Teslovich, T., Dellarco, D. V., Garavan, H., et al. (2018). The adolescent brain cognitive development (abcd) study: imaging acquisition across 21 sites. *Developmental Cognitive Neuroscience* **32**, 43–54.
- Gelman, A. and Rubin, D. B. (1992). Inference from iterative simulation using multiple sequences. *Statistical Science* **7**, 457–472.
- Polson, N. G., Scott, J. G., and Windle, J. (2013). Bayesian inference for logistic models using pólya–gamma latent variables. *Journal of the American statistical Association* **108**, 1339–1349.



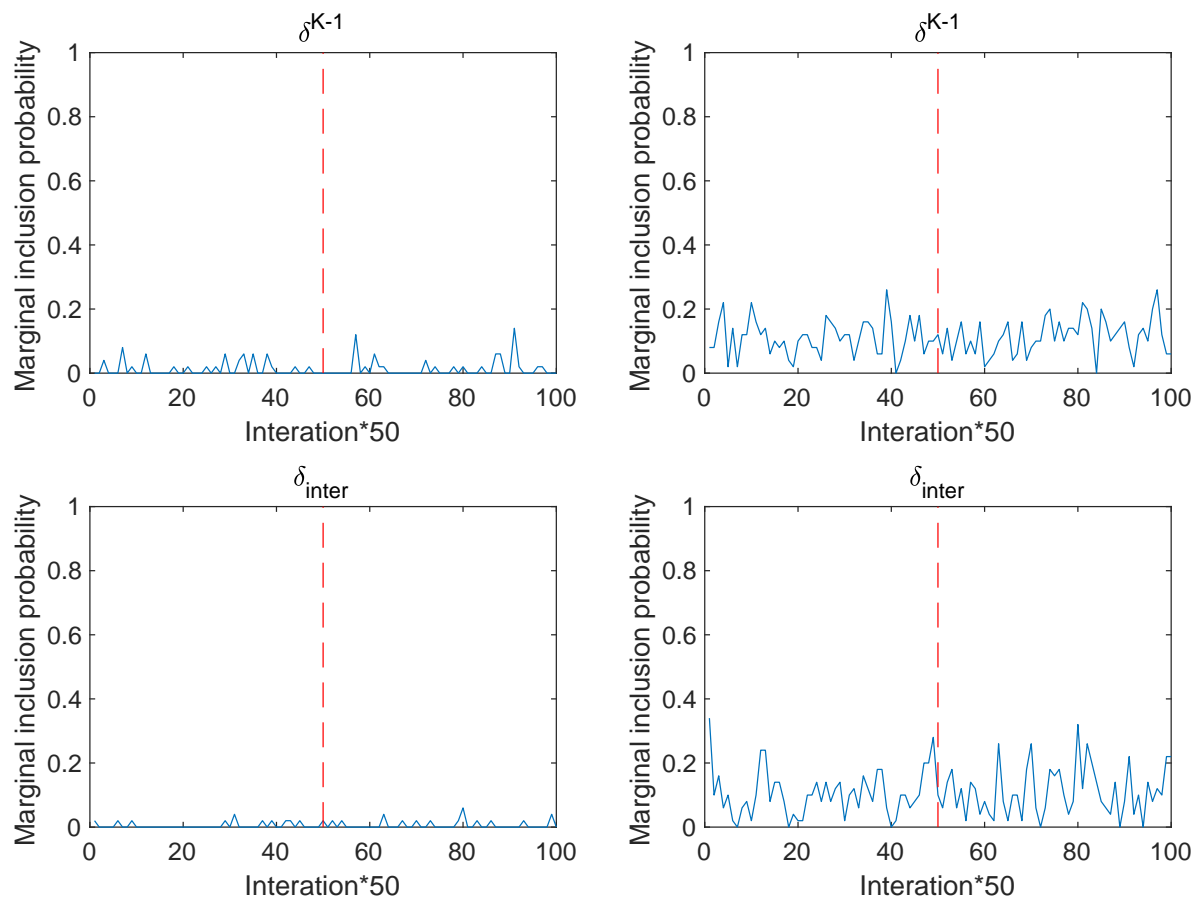

**Figure 1** The trace plots over 5,000 iterations for two randomly selected main effect indicator and two randomly selected interaction indicator for their marginal inclusion probability over every 50 iterations on simulated 2D image data with  $n = 300$  and high noise. The burn-in period is marked by the red dashed line.

BSSS-P3

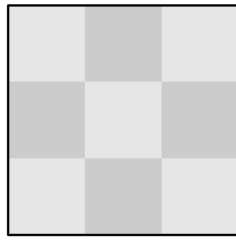

(a) partition level 1

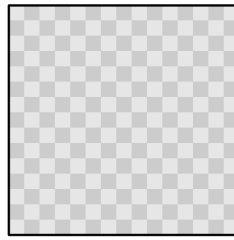

(b) partition level 2

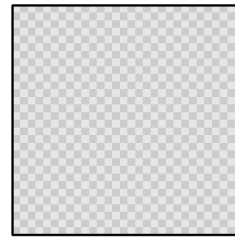

(c) partition level 3

BSSS-P4

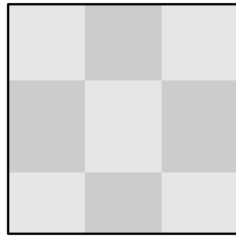

(a) partition level 1

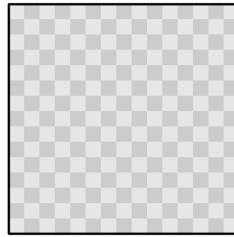

(b) partition level 2

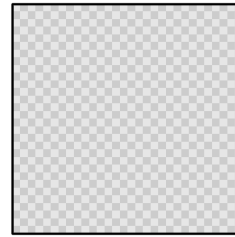

(c) partition level 3

BSSS-P5

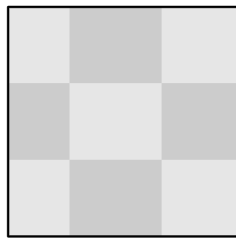

(a) partition level 1

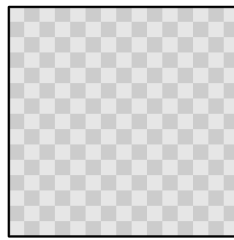

(b) partition level 2

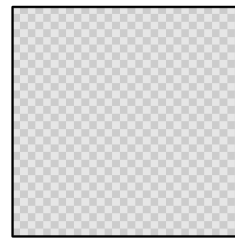

(c) partition level 3

**Figure 2** An illustration of the partition design at each level for BSSS-P3, BSSS-P4 and BSSS-P5. Level 3 for each case corresponds to the partition for each pixel.

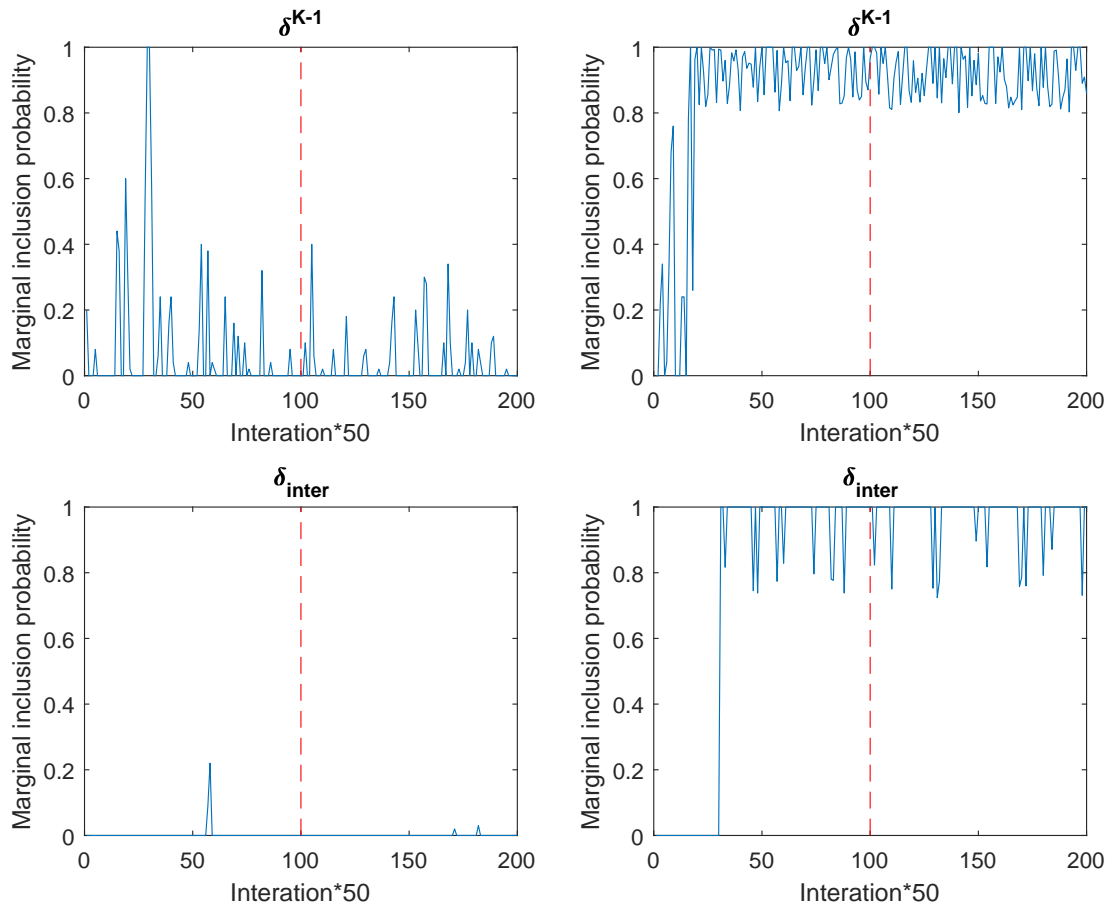

**Figure 3** The trace plots over 10,000 iterations for two randomly selected main effect indicator and two randomly selected interaction indicator for their marginal inclusion probability over every 50 iterations. The burn-in period is marked by the red dashed line.

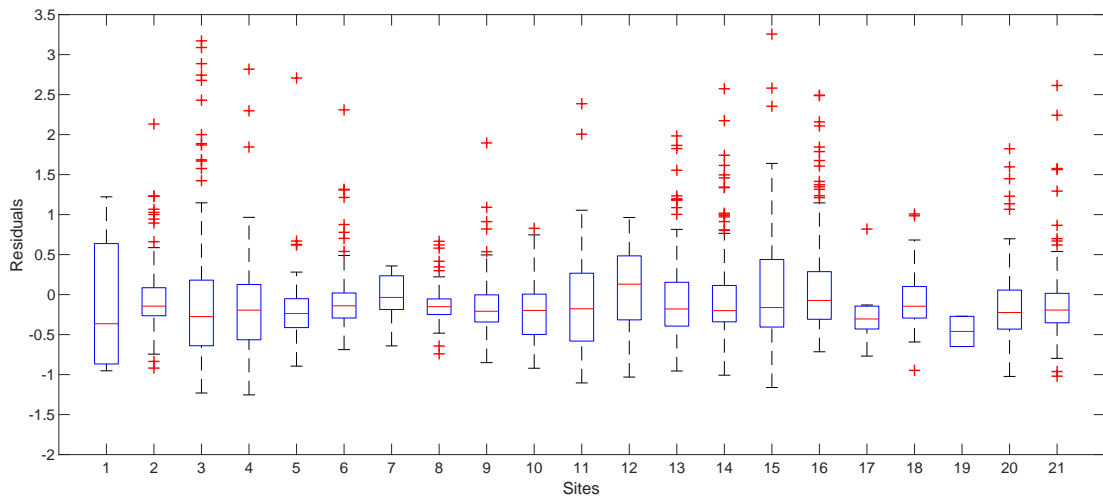

Figure 4 The box plot of residuals estimated over 21 sites.

**Table 1** Additional simulation results with different partition designs for BSSS implementation are evaluated by AUCs on identifying features within main effects and interaction ( $AUC_{all}$ ), main effects only ( $AUC_{main}$ ) and interaction only ( $AUC_{inter}$ ); and out-of-sample prediction ( $R^2$ ). The Monte Carlo standard deviation for each metric is included in the parentheses.

| 2D Image |         |              |              |               |              |              |              |               |              |
|----------|---------|--------------|--------------|---------------|--------------|--------------|--------------|---------------|--------------|
| $n$      | Method  | Low noise    |              |               |              | High noise   |              |               |              |
|          |         | $AUC_{all}$  | $AUC_{main}$ | $AUC_{inter}$ | $R^2$        | $AUC_{all}$  | $AUC_{main}$ | $AUC_{inter}$ | $R^2$        |
| 100      | BSSS-P1 | 0.919(0.018) | 0.914(0.022) | 0.966(0.021)  | 0.734(0.058) | 0.902(0.021) | 0.897(0.027) | 0.957(0.025)  | 0.509(0.072) |
|          | BSSS-P2 | 0.962(0.010) | 0.969(0.008) | 0.976(0.009)  | 0.744(0.057) | 0.947(0.014) | 0.962(0.012) | 0.970(0.012)  | 0.520(0.069) |
|          | BSSS-P3 | 0.946(0.078) | 0.954(0.085) | 0.969(0.080)  | 0.730(0.101) | 0.876(0.153) | 0.891(0.178) | 0.911(0.172)  | 0.463(0.146) |
|          | BSSS-P4 | 0.918(0.111) | 0.920(0.118) | 0.950(0.142)  | 0.717(0.124) | 0.862(0.154) | 0.871(0.174) | 0.905(0.186)  | 0.467(0.123) |
|          | BSSS-P5 | 0.913(0.094) | 0.916(0.103) | 0.955(0.109)  | 0.709(0.121) | 0.871(0.133) | 0.878(0.152) | 0.928(0.149)  | 0.469(0.135) |
| 300      | BSSS-P1 | 0.939(0.017) | 0.933(0.019) | 0.968(0.027)  | 0.783(0.037) | 0.931(0.012) | 0.923(0.016) | 0.974(0.013)  | 0.566(0.054) |
|          | BSSS-P2 | 0.975(0.003) | 0.976(0.003) | 0.980(0.006)  | 0.788(0.037) | 0.969(0.006) | 0.973(0.005) | 0.979(0.008)  | 0.572(0.054) |
|          | BSSS-P3 | 0.973(0.003) | 0.975(0.004) | 0.982(0.005)  | 0.788(0.037) | 0.966(0.007) | 0.972(0.005) | 0.982(0.007)  | 0.572(0.053) |
|          | BSSS-P4 | 0.955(0.015) | 0.953(0.020) | 0.981(0.005)  | 0.785(0.038) | 0.953(0.011) | 0.953(0.015) | 0.981(0.006)  | 0.570(0.053) |
|          | BSSS-P5 | 0.955(0.017) | 0.956(0.024) | 0.983(0.005)  | 0.784(0.038) | 0.950(0.013) | 0.954(0.019) | 0.982(0.007)  | 0.568(0.055) |
| 500      | BSSS-P1 | 0.939(0.019) | 0.931(0.020) | 0.967(0.024)  | 0.793(0.032) | 0.936(0.015) | 0.929(0.018) | 0.971(0.020)  | 0.575(0.042) |
|          | BSSS-P2 | 0.977(0.003) | 0.977(0.003) | 0.982(0.005)  | 0.796(0.032) | 0.973(0.004) | 0.975(0.004) | 0.981(0.006)  | 0.579(0.042) |
|          | BSSS-P3 | 0.975(0.003) | 0.976(0.004) | 0.984(0.004)  | 0.796(0.032) | 0.970(0.005) | 0.973(0.004) | 0.983(0.005)  | 0.580(0.042) |
|          | BSSS-P4 | 0.948(0.014) | 0.945(0.018) | 0.982(0.004)  | 0.794(0.032) | 0.954(0.015) | 0.951(0.018) | 0.982(0.005)  | 0.578(0.042) |
|          | BSSS-P5 | 0.951(0.025) | 0.951(0.033) | 0.984(0.004)  | 0.793(0.032) | 0.954(0.012) | 0.954(0.019) | 0.983(0.005)  | 0.576(0.042) |

**Table 2** Simulation results with generation in light of the ABCD data under different noise levels. The selection accuracy is quantified by AUCs on identifying features within main effects and interaction ( $AUC_{all}$ ), main effects only ( $AUC_{main}$ ) and interaction only ( $AUC_{inter}$ ); and prediction is evaluated by out-of-sample prediction ( $R^2$ ). The Monte Carlo standard deviation for each metric is included in the parentheses.

|            | Method    | $AUC_{all}$   | $AUC_{main}$  | $AUC_{inter}$ | $R^2$         |
|------------|-----------|---------------|---------------|---------------|---------------|
| Low noise  | BSSS      | 0.889 (0.003) | 0.941 (0.002) | 0.640 (0.008) | 0.978 (0.002) |
|            | LASSO     | 0.510 (0.005) | 0.510 (0.005) | 0.509 (0.011) | 0.970 (0.002) |
|            | horseshoe | 0.563 (0.006) | 0.581 (0.006) | 0.559 (0.018) | 0.947 (0.003) |
| High noise | BSSS      | 0.843 (0.003) | 0.979 (0.001) | 0.567 (0.010) | 0.663 (0.004) |
|            | LASSO     | 0.506 (0.006) | 0.509 (0.005) | 0.505 (0.010) | 0.485 (0.006) |
|            | horseshoe | 0.515 (0.006) | 0.526 (0.006) | 0.511 (0.011) | 0.359 (0.007) |

**Table 3** The median proportion of the voxels with the posterior inclusion probability higher than 0.95 on the AAL regions from the main and interaction effect results for the ABCD study.

|                      | 2back-0back | 2back | 0back | 2back-0back×2back | 2back-0back×0back | 2back×0back |
|----------------------|-------------|-------|-------|-------------------|-------------------|-------------|
| Precentral_L         | 0.055       | 0.074 | 0.088 | 0.063             | 0.032             | 0.066       |
| Precentral_R         | 0.051       | 0.048 | 0.065 | 0.060             | 0.029             | 0.076       |
| Frontal_Sup_L        | 0.016       | 0.020 | 0.022 | 0.056             | 0.046             | 0.066       |
| Frontal_Sup_R        | 0.027       | 0.031 | 0.040 | 0.059             | 0.035             | 0.078       |
| Frontal_Sup_Orb_L    | 0.051       | 0.048 | 0.068 | 0.041             | 0.068             | 0.024       |
| Frontal_Sup_Orb_R    | 0.039       | 0.048 | 0.048 | 0.045             | 0.064             | 0.023       |
| Frontal_Mid_L        | 0.008       | 0.010 | 0.008 | 0.046             | 0.036             | 0.061       |
| Frontal_Mid_R        | 0.075       | 0.077 | 0.087 | 0.054             | 0.045             | 0.051       |
| Frontal_Mid_Orb_L    | 0.067       | 0.063 | 0.078 | 0.026             | 0.070             | 0.007       |
| Frontal_Mid_Orb_R    | 0.048       | 0.061 | 0.068 | 0.048             | 0.054             | 0.014       |
| Frontal_Inf_Oper_L   | 0.107       | 0.104 | 0.153 | 0.086             | 0.037             | 0.071       |
| Frontal_Inf_Oper_R   | 0.116       | 0.154 | 0.166 | 0.057             | 0.045             | 0.067       |
| Frontal_Inf_Tri_L    | 0.107       | 0.103 | 0.106 | 0.056             | 0.055             | 0.052       |
| Frontal_Inf_Tri_R    | 0.097       | 0.107 | 0.122 | 0.038             | 0.056             | 0.051       |
| Frontal_Inf_Orb_L    | 0.147       | 0.159 | 0.181 | 0.052             | 0.060             | 0.018       |
| Frontal_Inf_Orb_R    | 0.109       | 0.139 | 0.158 | 0.048             | 0.077             | 0.026       |
| Rolandic_Oper_L      | 0.070       | 0.053 | 0.053 | 0.033             | 0.040             | 0.040       |
| Rolandic_Oper_R      | 0.088       | 0.078 | 0.090 | 0.055             | 0.065             | 0.055       |
| Supp_Motor_Area_L    | 0.053       | 0.061 | 0.053 | 0.070             | 0.021             | 0.096       |
| Supp_Motor_Area_R    | 0.110       | 0.132 | 0.125 | 0.075             | 0.020             | 0.087       |
| Olfactory_L          | 0.046       | 0.069 | 0.103 | 0.034             | 0.034             | 0.000       |
| Olfactory_R          | 0.025       | 0.062 | 0.062 | 0.049             | 0.037             | 0.012       |
| Frontal_Sup_Medial_L | 0.125       | 0.134 | 0.138 | 0.051             | 0.046             | 0.061       |
| Frontal_Sup_Medial_R | 0.103       | 0.136 | 0.133 | 0.041             | 0.041             | 0.053       |
| Frontal_Med_Orb_L    | 0.151       | 0.147 | 0.191 | 0.031             | 0.076             | 0.022       |
| Frontal_Med_Orb_R    | 0.115       | 0.141 | 0.195 | 0.027             | 0.065             | 0.019       |
| Rectus_L             | 0.096       | 0.084 | 0.115 | 0.061             | 0.057             | 0.027       |
| Rectus_R             | 0.078       | 0.073 | 0.073 | 0.037             | 0.064             | 0.037       |
| Insula_L             | 0.097       | 0.117 | 0.118 | 0.037             | 0.067             | 0.030       |
| Insula_R             | 0.130       | 0.167 | 0.189 | 0.041             | 0.069             | 0.028       |
| Cingulum_Ant_L       | 0.148       | 0.150 | 0.169 | 0.038             | 0.045             | 0.054       |
| Cingulum_Ant_R       | 0.141       | 0.151 | 0.174 | 0.040             | 0.050             | 0.045       |
| Cingulum_Mid_L       | 0.103       | 0.110 | 0.116 | 0.053             | 0.039             | 0.052       |
| Cingulum_Mid_R       | 0.117       | 0.109 | 0.142 | 0.048             | 0.053             | 0.066       |
| Cingulum_Post_L      | 0.080       | 0.036 | 0.080 | 0.080             | 0.036             | 0.066       |
| Cingulum_Post_R      | 0.023       | 0.034 | 0.023 | 0.046             | 0.034             | 0.046       |
| Hippocampus_L        | 0.147       | 0.150 | 0.194 | 0.051             | 0.070             | 0.011       |
| Hippocampus_R        | 0.160       | 0.194 | 0.212 | 0.052             | 0.076             | 0.021       |
| ParaHippocampal_L    | 0.080       | 0.091 | 0.091 | 0.056             | 0.077             | 0.024       |
| ParaHippocampal_R    | 0.187       | 0.187 | 0.269 | 0.047             | 0.066             | 0.032       |
| Amygdala_L           | 0.065       | 0.048 | 0.081 | 0.048             | 0.065             | 0.048       |
| Amygdala_R           | 0.100       | 0.086 | 0.114 | 0.014             | 0.043             | 0.014       |
| Calcarine_L          | 0.093       | 0.108 | 0.136 | 0.046             | 0.060             | 0.025       |
| Calcarine_R          | 0.166       | 0.164 | 0.199 | 0.046             | 0.072             | 0.020       |
| Cuneus_L             | 0.067       | 0.056 | 0.071 | 0.049             | 0.047             | 0.071       |
| Cuneus_R             | 0.136       | 0.150 | 0.182 | 0.032             | 0.035             | 0.069       |
| Lingual_L            | 0.132       | 0.179 | 0.203 | 0.027             | 0.061             | 0.023       |
| Lingual_R            | 0.112       | 0.140 | 0.161 | 0.041             | 0.069             | 0.016       |
| Occipital_Sup_L      | 0.068       | 0.068 | 0.073 | 0.053             | 0.053             | 0.076       |
| Occipital_Sup_R      | 0.061       | 0.075 | 0.063 | 0.042             | 0.044             | 0.065       |
| Occipital_Mid_L      | 0.066       | 0.088 | 0.101 | 0.043             | 0.047             | 0.044       |
| Occipital_Mid_R      | 0.077       | 0.064 | 0.079 | 0.047             | 0.050             | 0.050       |
| Occipital_Inf_L      | 0.075       | 0.131 | 0.104 | 0.030             | 0.056             | 0.019       |
| Occipital_Inf_R      | 0.076       | 0.083 | 0.086 | 0.035             | 0.051             | 0.019       |
| Fusiform_L           | 0.106       | 0.116 | 0.146 | 0.058             | 0.051             | 0.028       |
| Fusiform_R           | 0.105       | 0.104 | 0.142 | 0.055             | 0.047             | 0.029       |
| Postcentral_L        | 0.013       | 0.020 | 0.016 | 0.061             | 0.036             | 0.066       |
| Postcentral_R        | 0.046       | 0.065 | 0.081 | 0.059             | 0.040             | 0.064       |
| Parietal_Sup_L       | 0.068       | 0.082 | 0.084 | 0.062             | 0.022             | 0.076       |
| Parietal_Sup_R       | 0.113       | 0.138 | 0.127 | 0.057             | 0.022             | 0.091       |
| Parietal_Inf_L       | 0.057       | 0.063 | 0.063 | 0.046             | 0.029             | 0.063       |
| Parietal_Inf_R       | 0.124       | 0.131 | 0.143 | 0.069             | 0.033             | 0.057       |
| SupraMarginal_L      | 0.085       | 0.065 | 0.071 | 0.045             | 0.042             | 0.065       |
| SupraMarginal_R      | 0.131       | 0.156 | 0.142 | 0.047             | 0.040             | 0.071       |
| Angular_L            | 0.067       | 0.088 | 0.076 | 0.067             | 0.041             | 0.079       |
| Angular_R            | 0.073       | 0.071 | 0.069 | 0.046             | 0.034             | 0.071       |
| Precuneus_L          | 0.041       | 0.053 | 0.048 | 0.052             | 0.037             | 0.083       |
| Precuneus_R          | 0.047       | 0.044 | 0.043 | 0.051             | 0.039             | 0.068       |
| ParacentralLobule_L  | 0.090       | 0.116 | 0.130 | 0.076             | 0.028             | 0.071       |
| ParacentralLobule_R  | 0.048       | 0.084 | 0.084 | 0.066             | 0.022             | 0.084       |
| Caudate_L            | 0.090       | 0.101 | 0.122 | 0.036             | 0.079             | 0.043       |
| Caudate_R            | 0.092       | 0.067 | 0.092 | 0.049             | 0.056             | 0.042       |
| Putamen_L            | 0.082       | 0.088 | 0.082 | 0.042             | 0.056             | 0.016       |
| Putamen_R            | 0.096       | 0.093 | 0.102 | 0.043             | 0.053             | 0.022       |
| Pallidum_L           | 0.025       | 0.037 | 0.062 | 0.012             | 0.037             | 0.025       |
| Pallidum_R           | 0.039       | 0.039 | 0.039 | 0.026             | 0.105             | 0.013       |
| Thalamus_L           | 0.070       | 0.086 | 0.118 | 0.029             | 0.093             | 0.029       |
| Thalamus_R           | 0.075       | 0.062 | 0.078 | 0.039             | 0.081             | 0.029       |
| Heschl_L             | 0.069       | 0.069 | 0.042 | 0.014             | 0.056             | 0.028       |
| Heschl_R             | 0.082       | 0.082 | 0.068 | 0.055             | 0.055             | 0.014       |
| Temporal_Sup_L       | 0.068       | 0.082 | 0.068 | 0.037             | 0.070             | 0.034       |
| Temporal_Sup_R       | 0.091       | 0.107 | 0.120 | 0.036             | 0.065             | 0.039       |
| Temporal_Pole_Sup_L  | 0.076       | 0.079 | 0.120 | 0.042             | 0.071             | 0.039       |
| Temporal_Pole_Sup_R  | 0.128       | 0.128 | 0.198 | 0.033             | 0.070             | 0.025       |
| Temporal_Mid_L       | 0.040       | 0.035 | 0.036 | 0.044             | 0.071             | 0.031       |
| Temporal_Mid_R       | 0.071       | 0.088 | 0.114 | 0.047             | 0.071             | 0.027       |
| Temporal_Pole_Mid_L  | 0.113       | 0.090 | 0.158 | 0.045             | 0.036             | 0.027       |
| Temporal_Pole_Mid_R  | 0.095       | 0.106 | 0.138 | 0.092             | 0.054             | 0.060       |
| Temporal_Inf_L       | 0.136       | 0.126 | 0.177 | 0.065             | 0.053             | 0.030       |
| Temporal_Inf_R       | 0.098       | 0.107 | 0.145 | 0.052             | 0.058             | 0.032       |

**Table 4** The proportion of the voxels with the posterior inclusion probability higher than 0.95 on the top 5 AAL regions from 5 partition designs under the BSSS implementation for the ABCD study.

| 2back-0back          |             |             |             |             |             |
|----------------------|-------------|-------------|-------------|-------------|-------------|
|                      | partition 1 | partition 2 | partition 3 | partition 4 | partition 5 |
| ParaHippocampal_R    | 0.187       | 0.203       | 0.184       | 0.193       | 0.142       |
| Calcarine_R          | 0.166       | 0.185       | 0.173       | 0.166       | 0.076       |
| Hippocampus_R        | 0.115       | 0.160       | 0.198       | 0.181       | 0.115       |
| Frontal_Med_Orb_L    | 0.169       | 0.151       | 0.133       | 0.204       | 0.111       |
| Cingulum_Ant_L       | 0.110       | 0.178       | 0.153       | 0.148       | 0.063       |
| 2back                |             |             |             |             |             |
|                      | partition 1 | partition 2 | partition 3 | partition 4 | partition 5 |
| Hippocampus_R        | 0.219       | 0.184       | 0.194       | 0.205       | 0.125       |
| ParaHippocampal_R    | 0.231       | 0.187       | 0.237       | 0.180       | 0.089       |
| Lingual_L            | 0.212       | 0.179       | 0.194       | 0.176       | 0.097       |
| Insula_R             | 0.184       | 0.202       | 0.167       | 0.135       | 0.080       |
| Calcarine_R          | 0.194       | 0.164       | 0.175       | 0.164       | 0.103       |
| 0back                |             |             |             |             |             |
|                      | partition 1 | partition 2 | partition 3 | partition 4 | partition 5 |
| ParaHippocampal_R    | 0.446       | 0.269       | 0.282       | 0.269       | 0.146       |
| Hippocampus_R        | 0.306       | 0.212       | 0.247       | 0.201       | 0.104       |
| Lingual_L            | 0.280       | 0.209       | 0.177       | 0.203       | 0.091       |
| Calcarine_R          | 0.232       | 0.199       | 0.220       | 0.197       | 0.092       |
| Temporal_Pole_Sup_R  | 0.275       | 0.188       | 0.198       | 0.228       | 0.080       |
| 2back-0back×2back    |             |             |             |             |             |
|                      | partition 1 | partition 2 | partition 3 | partition 4 | partition 5 |
| Temporal_Pole_Mid_R  | 0.100       | 0.100       | 0.063       | 0.074       | 0.092       |
| Frontal_Inf_Oper_L   | 0.095       | 0.086       | 0.086       | 0.037       | 0.071       |
| Cingulum_Post_L      | 0.080       | 0.058       | 0.080       | 0.131       | 0.109       |
| Paracentral_Lobule_L | 0.081       | 0.052       | 0.081       | 0.076       | 0.066       |
| Supp_Motor_Area_R    | 0.068       | 0.071       | 0.075       | 0.095       | 0.077       |
| 2back-0back×0back    |             |             |             |             |             |
|                      | partition 1 | partition 2 | partition 3 | partition 4 | partition 5 |
| Pallidum_R           | 0.092       | 0.105       | 0.066       | 0.118       | 0.158       |
| Thalamus_L           | 0.032       | 0.112       | 0.067       | 0.093       | 0.102       |
| Thalamus_R           | 0.101       | 0.078       | 0.081       | 0.081       | 0.098       |
| Caudate_L            | 0.050       | 0.083       | 0.086       | 0.079       | 0.079       |
| Frontal_Inf_Orb_R    | 0.079       | 0.077       | 0.063       | 0.081       | 0.061       |
| 2back×0back          |             |             |             |             |             |
|                      | partition 1 | partition 2 | partition 3 | partition 4 | partition 5 |
| Supp_Motor_Area_L    | 0.108       | 0.096       | 0.070       | 0.069       | 0.099       |
| Parietal_Sup_R       | 0.121       | 0.077       | 0.066       | 0.122       | 0.091       |
| Supp_Motor_Area_R    | 0.134       | 0.078       | 0.087       | 0.081       | 0.087       |
| Paracentral_Lobule_R | 0.053       | 0.088       | 0.110       | 0.075       | 0.084       |
| Precuneus_L          | 0.084       | 0.083       | 0.101       | 0.081       | 0.071       |



**Table 5** The proportion of the voxels with the posterior inclusion probability higher than 0.95 on the top 3 functional sub-networks from 5 partition designs under the BSSS implementation for the ABCD study.

| 2back-0back                    |             |             |             |             |             |
|--------------------------------|-------------|-------------|-------------|-------------|-------------|
|                                | partition 1 | partition 2 | partition 3 | partition 4 | partition 5 |
| Auditory                       | 0.053       | 0.130       | 0.160       | 0.136       | 0.036       |
| Cingulo-opercular Task Control | 0.040       | 0.115       | 0.150       | 0.150       | 0.053       |
| Visual                         | 0.086       | 0.105       | 0.131       | 0.150       | 0.068       |
| 2back                          |             |             |             |             |             |
|                                | partition 1 | partition 2 | partition 3 | partition 4 | partition 5 |
| Auditory                       | 0.047       | 0.130       | 0.148       | 0.160       | 0.036       |
| Visual                         | 0.117       | 0.103       | 0.126       | 0.143       | 0.072       |
| Memory retrieval               | 0.091       | 0.159       | 0.114       | 0.227       | 0.045       |
| 0back                          |             |             |             |             |             |
|                                | partition 1 | partition 2 | partition 3 | partition 4 | partition 5 |
| Visual                         | 0.173       | 0.133       | 0.147       | 0.178       | 0.061       |
| Memory retrieval               | 0.136       | 0.182       | 0.136       | 0.159       | 0.023       |
| Auditory                       | 0.148       | 0.148       | 0.124       | 0.136       | 0.053       |
| 2back-0back×2back              |             |             |             |             |             |
|                                | partition 1 | partition 2 | partition 3 | partition 4 | partition 5 |
| Cingulo-opercular Task Control | 0.026       | 0.062       | 0.048       | 0.062       | 0.084       |
| Sensory/somatomotor Hand       | 0.051       | 0.067       | 0.070       | 0.062       | 0.056       |
| Auditory                       | 0.036       | 0.053       | 0.059       | 0.089       | 0.089       |
| 2back-0back×0back              |             |             |             |             |             |
|                                | partition 1 | partition 2 | partition 3 | partition 4 | partition 5 |
| Subcortical                    | 0.107       | 0.062       | 0.062       | 0.080       | 0.080       |
| Memory retrieval               | 0.068       | 0.068       | 0.091       | 0.091       | 0.045       |
| Salience                       | 0.062       | 0.062       | 0.052       | 0.055       | 0.069       |
| 2back×0back                    |             |             |             |             |             |
|                                | partition 1 | partition 2 | partition 3 | partition 4 | partition 5 |
| Ventral attention              | 0.059       | 0.129       | 0.106       | 0.059       | 0.106       |
| Fronto-parietal Task Control   | 0.072       | 0.049       | 0.062       | 0.075       | 0.068       |
| Auditory                       | 0.124       | 0.059       | 0.053       | 0.018       | 0.071       |
